# Supplementary material
Source: Research Square preprint supplement (doi:10.21203/rs.3.rs-8918108/v1)
Supplement: Supplementary file 1 [file a7f3d8eb9e9cfeeb064b2c9f.pdf]

1. A Hybrid Model of Predicting Land Use Scenarios for Sustainable Urban Planning in Debre Birhan City, Ethiopia.
2. <https://orcid.org/0009-0001-1129-429X>
3. **I incorporated the comments that has been given under the declaration section subheadings in the manuscript**
